# Supplementary material
Source: Springer Nature journal article supplement (https://www.springermedizin.de/resource/supplementary/12950_2009_152_MOESM3_ESM.pdf/9558072)

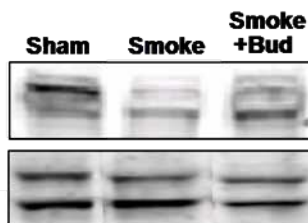

**A**

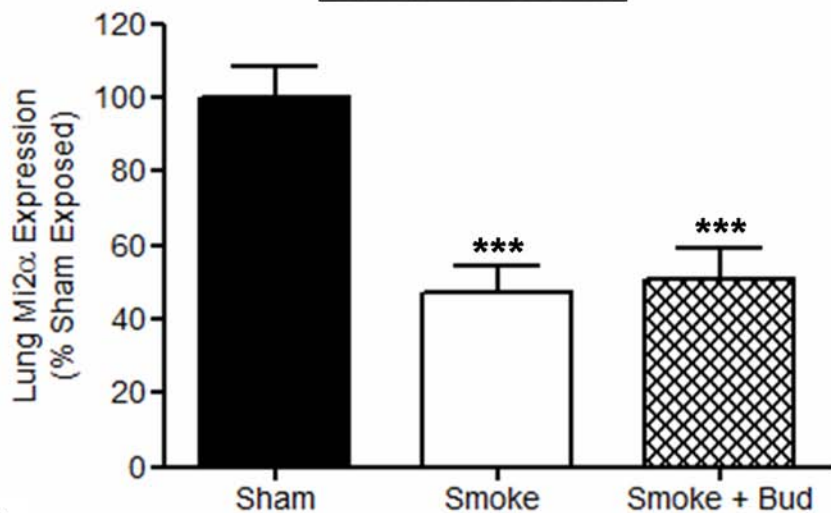

**B**

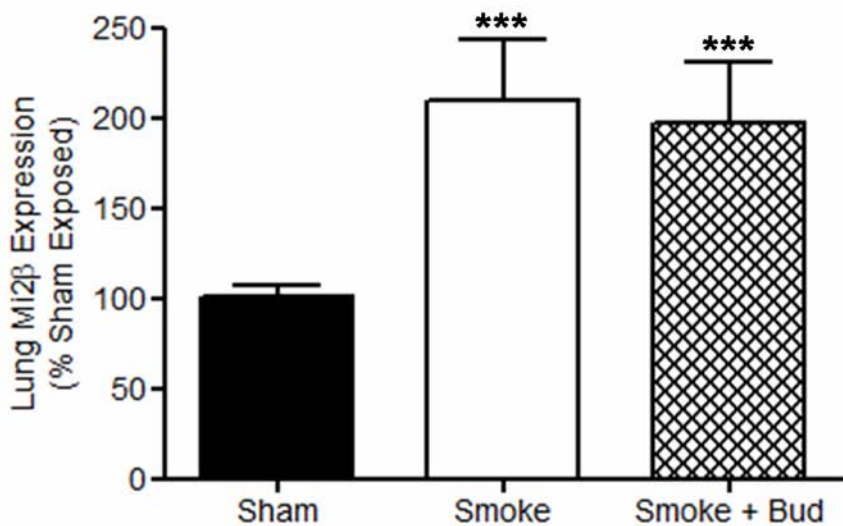

Supplement: MOESM3 [file 9558072]
